# Supplementary material
Source: HighWire-hosted journal article supplement (https://jnm.snmjournals.org/highwire/filestream/103409/field_highwire_adjunct_files/0/260141_Supplemental_Data.pdf)
Supplement: 260141_Supplemental_Data.pdf [file 260141_Supplemental_Data.pdf]

Supplemental Table 1:

|                                                         | Pharmacologic stress<br>(n=8,272) | Exercise stress<br>(n=5,744) | P-value |
|---------------------------------------------------------|-----------------------------------|------------------------------|---------|
| Rest shape index(%), mean±SD                            | 64.9 ± 8.0                        | 63.1 ± 6.9                   | <0.001  |
| Stress shape index(%), mean±SD                          | 64.9 ± 7.8                        | 61.4 ± 6.3                   | <0.001  |
| Post-stress change in shape index(%),<br>mean±SD        | 0.2 ± 4.1                         | -1.7 ± 3.9                   | <0.001  |
| Rest eccentricity index(%), mean±SD                     | 80.4 ± 4.7                        | 81.9 ± 4.3                   | <0.001  |
| Stress eccentricity index(%), mean±SD                   | 80.3 ± 4.8                        | 82.4 ± 3.9                   | <0.001  |
| Post-stress change in eccentricity index(%),<br>mean±SD | -0.1 ± 3.0                        | 0.5 ± 2.6                    | <0.001  |
| Resting TPD, mean±SD                                    | 2.4 ± 6.2                         | 1.2 ± 4.2                    | <0.001  |
| Stress TPD, mean±SD                                     | 5.7 ± 8.0                         | 3.7 ± 5.8                    | <0.001  |
| Ischemic TPD, mean±SD                                   | 3.2 ± 3.4                         | 2.5 ± 3.0                    | <0.001  |
| Resting LVEF, mean±SD                                   | 61.9 ± 14.0                       | 62.5 ± 10.8                  | <0.001  |
| Stress LVEF, mean±SD                                    | 60.8 ± 13.6                       | 62.4 ± 10.4                  | 0.003   |
| Change in LVEF, mean±SD                                 | -1.1 ± 7.3                        | -0.1 ± 7.2                   | <0.001  |
| Resting LVEDV, mean±SD                                  | 73.7 ± 40.8                       | 70.7 ± 27.5                  | <0.001  |
| Stress LVEDV, mean±SD                                   | 75.5 ± 42.2                       | 67.5 ± 26.8                  | <0.001  |
| Change in LVEDV, mean±SD                                | 1.8 ± 10.0                        | -3.2 ± 8.6                   | <0.001  |
| Transient ischemic dilation, n(%)                       | 353 (4.3)                         | 202 (3.5)                    | 0.046   |

Imaging Characteristics stratified by mode of stress. LVEDV – left ventricular end diastolic

volume, LVEF – left ventricular ejection fraction, MACE – major adverse cardiovascular event,

SD – standard deviation, TPD – total perfusion deficit

Supplemental Table 2: Unadjusted and Adjusted Associations with major adverse cardiovascular events (MACE) in a non-parsimonious model

| Variable                                           | Unadjusted HR<br>(95% CI) | P-value | Adjusted HR<br>(95% CI) | P-value |
|----------------------------------------------------|---------------------------|---------|-------------------------|---------|
| Rest shape index (per 10%)                         | 1.16(1.09 – 1.22)         | <0.001  | 1.06(0.95 – 1.18)       | 0.301   |
| Stress shape index (per 10%)                       | 1.40(1.33 – 1.47)         | <0.001  | *                       | *       |
| Post-stress change in shape index (per 10%)        | 2.01(1.82 – 2.22)         | <0.001  | 1.31(1.13 – 1.53)       | <0.001  |
| Rest eccentricity index (per 10%)                  | 0.82(0.75 – 0.89)         | <0.001  | 1.02(0.85 – 1.23)       | 0.828   |
| Stress eccentricity index (per 10%)                | 0.63(0.58 – 0.69)         | <0.001  | *                       | *       |
| Post-stress change in eccentricity index (per 10%) | 0.52(0.46 – 0.59)         | <0.001  | 0.81(0.66 – 0.99)       | 0.041   |
| Age (per 10 years)                                 | 1.52(1.47 – 1.58)         | <0.001  | 1.31(1.26 – 1.37)       | <0.001  |
| Male                                               | 1.62(1.48 – 1.78)         | <0.001  | 1.25(1.12 – 1.40)       | <0.001  |
| Body mass index                                    | 0.98(0.97 – 0.99)         | <0.001  | 0.98(0.97 – 0.99)       | 0.002   |
| Hypertension                                       | 1.82(1.65 – 2.01)         | <0.001  | 1.20(1.07 – 1.33)       | 0.001   |
| Diabetes                                           | 1.87(1.72 – 2.04)         | <0.001  | 1.37(1.25 – 1.51)       | <0.001  |
| Dyslipidemia                                       | 1.64(1.49 – 1.81)         | <0.001  | 1.02(0.92 – 1.13)       | 0.676   |
| Current smoker                                     | 0.95(0.83 – 1.06)         | 0.385   | 1.00(0.89 – 1.12)       | 0.975   |
| PVD                                                | 1.82(1.63 – 2.01)         | <0.001  | 1.05(0.94 – 1.18)       | 0.399   |
| Prior MI                                           | 2.40(2.18 – 2.65)         | <0.001  | 1.20(1.07 – 1.36)       | 0.002   |
| Prior revascularization                            | 2.87(2.63 – 3.12)         | <0.001  | 1.61(1.45 – 1.79)       | <0.001  |
| Family history of CAD                              | 0.73(0.66 – 0.82)         | <0.001  | 0.90(0.81 – 1.00)       | 0.047   |
| Typical angina                                     | 1.37(1.16 – 1.61)         | <0.001  | 1.20(1.02 – 1.41)       | 0.031   |

|                             |                   |        |                   |        |
|-----------------------------|-------------------|--------|-------------------|--------|
| Systolic BP (per 10 mmhg)   | 1.04(1.02 – 1.07) | <0.001 | 1.05(1.02 – 1.08) | <0.001 |
| Diastolic BP (per 10 mmhg)  | 0.85(0.82 – 0.89) | <0.001 | 0.84(0.80 – 0.89) | <0.001 |
| Heart Rate (per 10 bpm)     | 1.07(1.04 – 1.10) | <0.001 | 1.14(1.10 – 1.17) | <0.001 |
| Exercise stress             | 0.44(0.40 – 0.48) | <0.001 | 0.66(0.60 – 0.74) | <0.001 |
| Resting TPD                 | 1.05(1.04 – 1.05) | <0.001 | 0.99(0.99 – 1.00) | 0.086  |
| Stress TPD                  | 1.05(1.04 – 1.05) | <0.001 | *                 | *      |
| Ischemic TPD                | 1.12(1.11 – 1.13) | <0.001 | 1.05(1.03 – 1.06) | <0.001 |
| Resting LVEF                | 0.97(0.97 – 0.98) | <0.001 | 0.99(0.98 – 0.99) | <0.001 |
| Stress LVEF                 | 0.97(0.96 – 0.97) | <0.001 | *                 | *      |
| Change in LVEF              | 0.98(0.97 – 0.99) | <0.001 | 0.98(0.98 – 0.99) | <0.001 |
| Resting LVEDV               | 1.01(1.01 – 1.01) | <0.001 | 1.00(0.99 – 1.00) | 0.199  |
| Stress LVEDV†               | 1.01(1.01 – 1.01) | <0.001 | *                 | *      |
| Change in LVEDV†            | 1.02(1.02 – 1.02) | <0.001 | 1.00(1.00 – 1.00) | 0.639  |
| Transient ischemic dilation | 1.23(1.01 – 1.50) | 0.043  | 0.90(0.73 – 1.11) | 0.328  |

Unadjusted and Adjusted Associations with major adverse cardiovascular events (MACE) in a non-parsimonious model. \*- variable excluded due to inclusion of rest and change in variables.

†Multivariable results similar when considering left ventricular end-systolic volume in place of left ventricular end-diastolic volume (LVEDV). CAD – coronary artery disease, HR – hazard ratio, LVEDV – left ventricular end-diastolic volume, LVEF – left ventricular ejection fraction, MI – myocardial infarction, PVD – peripheral vascular disease, TID – transient ischemic dilation.

Supplemental Table 3: Summary of Reclassification

| Variable                                 | Event reclassification    | Non-event reclassification | Continuous net reclassification |
|------------------------------------------|---------------------------|----------------------------|---------------------------------|
| Rest shape index                         | -0.057 (-0.085 – 0.081)   | 0.044 (-0.032 – 0.066)     | -0.013 (-0.065 – 0.061)         |
| Stress shape index                       | -0.014 (-0.044 – 0.021)   | 0.093 (0.066 – 0.116)      | 0.079 (0.028 – 0.130)           |
| Post-stress change in Shape Index        | 0.080 (0.051 – 0.118)     | 0.074 (0.048 – 0.098)      | 0.154 (0.108 – 0.209)           |
| Rest eccentricity index                  | -0.056 (-0.082 – 0.094)   | 0.037 (-0.089 – 0.116)     | -0.018 (-0.069 – 0.076)         |
| Stress eccentricity index                | -0.066 (-0.093 to -0.024) | 0.127 (0.104 – 0.150)      | 0.061 (0.016 – 0.116)           |
| Post-stress change in eccentricity index | 0.061 (0.028 – 0.098)     | 0.056 (0.027 – 0.087)      | 0.117 (0.069 – 0.174)           |

Summary of Reclassification for inclusion of shape index and eccentricity variables.

Multivariable models adjusted for all variables other than shape index and eccentricity outlined in Table 3 including stress and ischemic TPD.

Supplemental Table 4: Comparison of Prognostic Accuracy

| Variable                                 | Threshold method            | Abnormal threshold | Annualized MACE abnormal | Annualized MACE normal | PPV   | NPV   |
|------------------------------------------|-----------------------------|--------------------|--------------------------|------------------------|-------|-------|
| Rest shape index                         | ROC                         | >64.21             | 3.6%                     | 3.2%                   | 16.2% | 85.8% |
|                                          | 95 <sup>th</sup> Percentile | >77.07             | 4.7%                     | 3.3%                   | 21.5% | 85.2% |
| Stress shape index                       | ROC                         | >63.83             | 4.2%                     | 2.7%                   | 18.5% | 87.5% |
|                                          | 95 <sup>th</sup> Percentile | >76.62             | 6.1%                     | 3.2%                   | 27.1% | 85.5% |
| Post-stress change in shape index        | ROC                         | >0.236             | 4.5%                     | 2.6%                   | 19.5% | 88.0% |
|                                          | 95 <sup>th</sup> Percentile | >5.65              | 5.0%                     | 3.3%                   | 23.3% | 85.3% |
| Rest eccentricity index                  | ROC                         | <81.47             | 3.1%                     | 3.7%                   | 16.4% | 86.1% |
|                                          | 95 <sup>th</sup> Percentile | <72.63             | 3.8%                     | 3.4%                   | 18.1% | 85.0% |
| Stress eccentricity index                | ROC                         | <81.32             | 4.1%                     | 2.8%                   | 18.1% | 87.4% |
|                                          | 95 <sup>th</sup> Percentile | <73.04             | 5.6%                     | 3.3%                   | 24.8% | 85.4% |
| Post-stress change in eccentricity index | ROC                         | < -0.18            | 4.1%                     | 2.8%                   | 18.1% | 87.2% |
|                                          | 95 <sup>th</sup> Percentile | < -3.97            | 4.7%                     | 3.2%                   | 22.5% | 85.3% |

Comparison of prognostic accuracy for abnormal thresholds derived using the Youden index

from receiver-operating characteristic (ROC) curves or as the 95<sup>th</sup> percentile. MACE – major

adverse cardiovascular events, NPV – negative predictive value, PPV – positive predictive value.

Supplemental Table 5: Thresholds for Abnormal Change in Shape Index

|               | ROC AUC (95% CI)       | Abnormal threshold | Annualized MACE negative | Annualized MACE positive |
|---------------|------------------------|--------------------|--------------------------|--------------------------|
| Overall       | 0.597 (0.584 – 0.610)  | >0.236             | 2.6%                     | 4.5%                     |
| Site held out |                        |                    |                          |                          |
| Assuta        | 0.620 (0.603 – 0.637)  | >0.263             | 4.4%                     | 5.3%                     |
| BW            | 0.597 (0.584 – 0.610)  | >0.236             | 0.6%                     | 3.7%                     |
| CSMC          | 0.592 (0.577 – 0.607)  | >0.236             | 2.4%                     | 4.1%                     |
| Oregon        | 0.587 (0.572 – 0.601)  | >0.236             | 1.8%                     | 4.7%                     |
| Ottawa        | 0.587 (0.573 – 0.6010) | >0.358             | 2.0%                     | 3.3%                     |

Thresholds for abnormal change in shape index in the overall population and in a leave one site out approach. In the leave one site out approach, receiver-operating characteristic (ROC) curves were generated from the remaining sites and the optimal ROC thresholds were then tested in the held-out site. AUC – area under the curve, BW – Brigham and Women’s, CI – confidence interval, CSMC – Cedars-Sinai Medical Center, MACE – major adverse cardiovascular event.

Supplemental Table 6:

|                                             | Unadjusted HR<br>(95% CI) | p-value | Adjusted HR<br>(95% CI) | P-value |
|---------------------------------------------|---------------------------|---------|-------------------------|---------|
| Rest shape index                            | 1.31 (1.23 – 1.40)        | <0.001  | 1.27 (1.12 – 1.45)      | <0.001  |
| Stress shape index                          | 1.58 (1.49 – 1.67)        | <0.001  | *                       | *       |
| Post-stress change in Shape<br>Index        | 2.18 (1.93 – 2.46)        | <0.001  | 1.59 (1.34 – 1.88)      | <0.001  |
| Rest eccentricity index                     | 0.65 (0.59 – 0.72)        | <0.001  | 1.09 (0.87 – 1.36)      | 0.455   |
| Stress eccentricity index                   | 0.52 (0.47 – 0.57)        | <0.001  | *                       | *       |
| Post-stress change in<br>eccentricity index | 0.53 (0.45 – 0.62)        | <0.001  | 1.05 (0.82 – 1.34)      | 0.713   |

Associations with all-cause mortality. Multivariable model included the same variables outlined in Table 3. \*- variable excluded due to inclusion of rest and change in variables. HR – hazard ratio

Supplemental Table 7:

|                                          | Mean $\pm$ SD  | Unadjusted HR<br>(95% CI) | p-value | Adjusted HR<br>(95% CI) | P-value |
|------------------------------------------|----------------|---------------------------|---------|-------------------------|---------|
| Exercise stress (n=5,744)                |                |                           |         |                         |         |
| Rest shape index                         | 63.1 $\pm$ 6.9 | 0.90 (0.80 – 1.02)        | 0.095   | 0.74 (0.55 – 0.98)      | 0.036   |
| Stress shape index                       | 61.4 $\pm$ 6.3 | 1.19 (1.04 – 1.36)        | 0.009   | *                       | *       |
| Post-stress change in shape index        | -1.7 $\pm$ 3.9 | 2.31 (1.85 – 2.90)        | <0.001  | 1.14 (0.80 – 1.63)      | 0.477   |
| Rest eccentricity index                  | 81.9 $\pm$ 4.3 | 1.07 (0.88 – 1.30)        | 0.520   | 0.57 (0.36 – 0.92)      | 0.022   |
| Stress eccentricity index                | 82.4 $\pm$ 3.9 | 0.74 (0.60 – 0.90)        | 0.003   | *                       | *       |
| Post-stress change in Eccentricity Index | 0.5 $\pm$ 2.6  | 0.40 (0.29 – 0.56)        | <0.001  | 0.44 (0.25 – 0.77)      | 0.004   |
| Pharmacologic stress (n=8,272)           |                |                           |         |                         |         |
| Rest shape index                         | 64.7 $\pm$ 8.0 | 1.16 (1.10 – 1.23)        | <0.001  | 1.14 (1.01 – 1.27)      | 0.030   |
| Stress shape index                       | 64.9 $\pm$ 7.8 | 1.29 (1.22 – 1.36)        | <0.001  | *                       | *       |
| Post-stress change in shape index        | 0.2 $\pm$ 4.1  | 1.53 (1.36 – 1.72)        | <0.001  | 1.41 (1.22 – 1.63)      | <0.001  |
| Rest eccentricity index                  | 80.4 $\pm$ 4.7 | 0.87 (0.79 – 0.96)        | 0.007   | 1.08 (0.89 – 1.31)      | 0.437   |
| Stress eccentricity index                | 80.3 $\pm$ 4.8 | 0.74 (0.67 – 0.81)        | <0.001  | *                       | *       |
| Post-stress change in eccentricity index | -0.1 $\pm$ 3.0 | 0.65 (0.56 – 0.75)        | <0.001  | 0.90 (0.73 – 1.11)      | 0.329   |

Associations between shape index and eccentricity index in patients undergoing exercise stress

and pharmacologic stress. Mean of all parameters was significantly different between exercise and pharmacologic stress. Multivariable models are the same as outlined for Table 3. Formal interaction testing was not significant for change in shape index (p=0.066) or change in eccentricity index (p=0.119). \*- variable excluded due to inclusion of rest and change in variables.



Supplemental Table 8:

|                                              | Mean $\pm$<br>SD | Unadjusted HR<br>(95% CI) | p-value | Adjusted HR<br>(95% CI) | P-value |
|----------------------------------------------|------------------|---------------------------|---------|-------------------------|---------|
| Preserved LVEF ( $\geq 40\%$ )<br>(n=13,283) |                  |                           |         |                         |         |
| Rest shape index                             | 63.7 $\pm$ 7.4   | 1.07 (1.01 – 1.14)        | 0.019   | 1.01 (0.89 – 1.13)      | 0.928   |
| Stress shape index                           | 63.1 $\pm$ 7.2   | 1.32 (1.25 – 1.40)        | <0.001  | *                       | *       |
| Post-stress change in<br>shape index         | -0.6 $\pm$ 4.1   | 2.03 (1.83 – 2.26)        | <0.001  | 1.35 (1.16 – 1.57)      | <0.001  |
| Rest eccentricity index                      | 81.2 $\pm$ 4.5   | 0.89 (0.81 – 0.98)        | 0.015   | 0.90 (0.74 – 1.10)      | 0.322   |
| Stress eccentricity index                    | 81.3 $\pm$ 4.5   | 0.67 (0.61 – 0.73)        | <0.001  | *                       | *       |
| Post-stress change in<br>eccentricity index  | 0.2 $\pm$ 2.8    | 0.50 (0.44 – 0.58)        | <0.001  | 0.73 (0.59 – 0.90)      | 0.004   |
| Reduced LVEF (<40%)<br>(n=733)               |                  |                           |         |                         |         |
| Rest shape index                             | 69.4 $\pm$ 8.7   | 1.14 (0.99 – 1.31)        | 0.065   | 1.39 (1.07 – 1.81)      | 0.014   |
| Stress shape index                           | 69.9 $\pm$ 8.8   | 1.22 (1.07 – 1.40)        | 0.003   | *                       | *       |
| Post-stress change in<br>shape index         | 0.5 $\pm$ 4.5    | 1.35 (1.05 – 1.73)        | 0.020   | 1.66 (1.18 – 2.34)      | 0.004   |
| Rest eccentricity index                      | 78.2 $\pm$ 5.3   | 0.91 (0.73 – 1.14)        | 0.402   | 1.69 (1.07 – 2.66)      | 0.024   |
| Stress eccentricity index                    | 78.1 $\pm$ 5.1   | 0.86 (0.68 – 1.08)        | 0.186   | *                       | *       |
| Post-stress change in<br>eccentricity index  | -0.2 $\pm$ 3.3   | 0.86 (0.59 – 1.25)        | 0.436   | 1.61 (0.92 – 2.81)      | 0.093   |

Associations between shape index and eccentricity index in patients with preserved or reduced

LVEF. Mean of all parameters was significantly different between reduced and preserved LVEF.

Multivariable models are the same as outlined for Table 3. Interaction testing was not significant

for post-stress change in shape index (p=0.279) or post-stress change in eccentricity index

(p=0.084). \*- variable excluded due to inclusion of rest and post-stress change in variables.

Supplemental Table 9:

|                                             | Mean $\pm$<br>SD | Unadjusted HR<br>(95% CI) | p-value | Adjusted HR<br>(95% CI) | P-value |
|---------------------------------------------|------------------|---------------------------|---------|-------------------------|---------|
| DSPECT (n=5,660)                            |                  |                           |         |                         |         |
| Rest shape index                            | 64.7 $\pm$ 8.6   | 1.23 (1.14 – 1.34)        | <0.001  | 1.20 (1.05 – 1.37)      | 0.006   |
| Stress shape index                          | 63.9 $\pm$ 8.3   | 1.41 (1.32 – 1.50)        | <0.001  | *                       | *       |
| Post-stress change in<br>shape index        | -0.7 $\pm$ 4.9   | 1.88 (1.60 – 2.21)        | <0.001  | 1.61 (1.36 – 1.91)      | <0.001  |
| Rest eccentricity index                     | 80.7 $\pm$ 5.3   | 0.73 (0.63 – 0.83)        | <0.001  | 1.19 (0.94 – 1.50)      | 0.153   |
| Stress eccentricity index                   | 81.0 $\pm$ 5.1   | 0.59 (0.52 – 0.67)        | <0.001  | *                       | *       |
| Post-stress change in<br>eccentricity index | 0.3 $\pm$ 3.8    | 0.39 (0.30 – 0.51)        | <0.001  | 0.96 (0.76 – 1.22)      | 0.761   |
| GE530 (n=8,356)                             |                  |                           |         |                         |         |
| Rest shape index                            | 63.6 $\pm$ 6.9   | 1.13 (1.05 – 1.22)        | 0.001   | 0.95 (0.80 – 1.12)      | 0.530   |
| Stress shape index                          | 63.2 $\pm$ 6.7   | 1.43 (1.33 – 1.55)        | <0.001  | *                       | *       |
| Post-stress change in<br>shape index        | -0.4 $\pm$ 3.5   | 2.11 (1.86 – 2.40)        | 0.020   | 1.24 (1.00 – 1.53)      | 0.049   |
| Rest eccentricity index                     | 81.2 $\pm$ 4.1   | 0.86 (0.76 – 0.96)        | 0.009   | 0.74 (0.56 – 0.97)      | 0.031   |
| Stress eccentricity index                   | 81.3 $\pm$ 4.1   | 0.64 (0.57 – 0.71)        | 0.186   | *                       | *       |
| Post-stress change in<br>eccentricity index | 0.1 $\pm$ 2.0    | 0.55 (0.47 – 0.64)        | 0.436   | 0.65 (0.46 – 0.93)      | 0.017   |

Associations between shape index and eccentricity index in patients imaged with DSPECT or GE530 cameras. Multivariable models are the same as outlined for Table 3. Interaction testing was not significant for post-stress change in shape index (p=0.113) or post-stress change in eccentricity index (p=0.687). \*- variable excluded due to inclusion of rest and post-stress change in variables.

Supplemental Figure 1: Correlation between shape index and eccentricity index

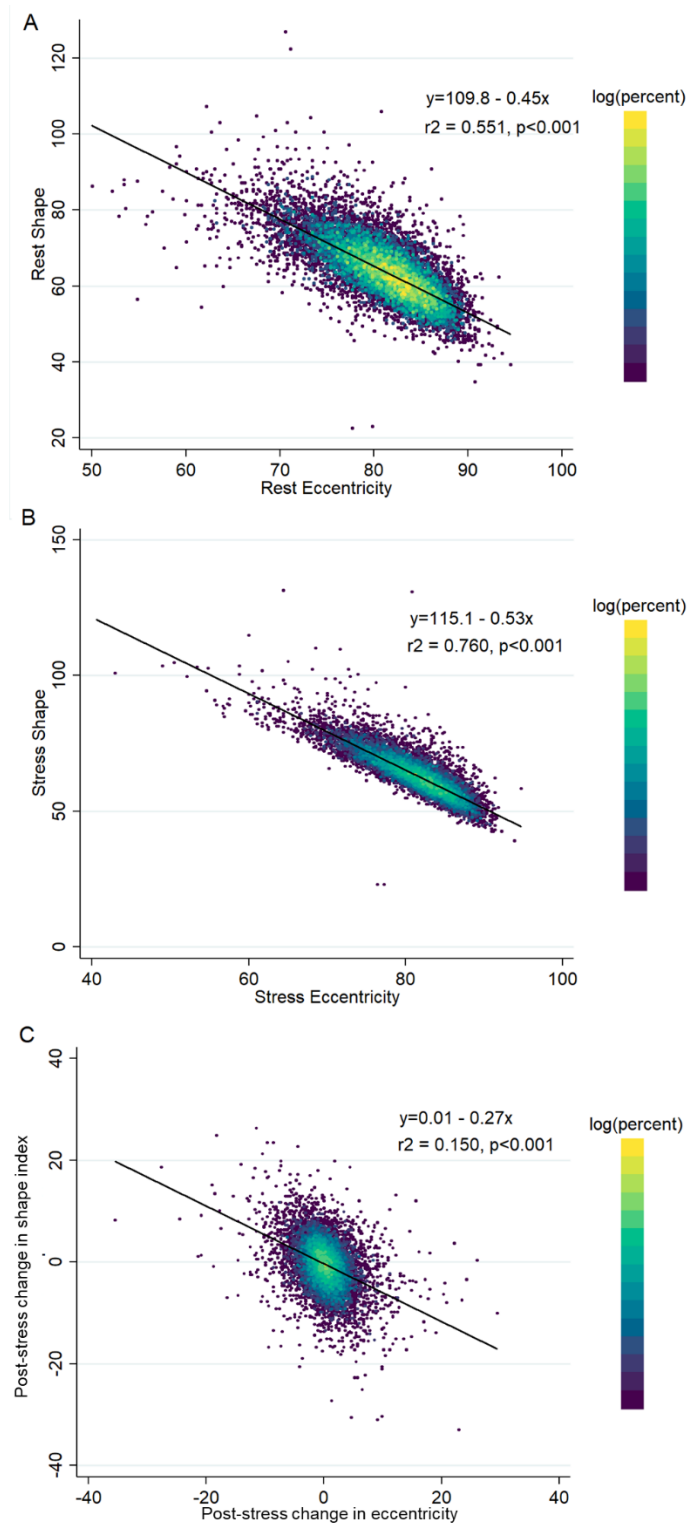

Supplemental Figure 1: Correlation gradient plots between shape index and eccentricity index.

Rest (A), stress (B) and post-stress change in (C) values were all significantly correlated

( $p < 0.001$ ).

Supplemental Figure 2 Correlation gradient plots between change in shape index and eccentricity index with transient ischemic dilation ratio and change in left ventricular ejection fraction

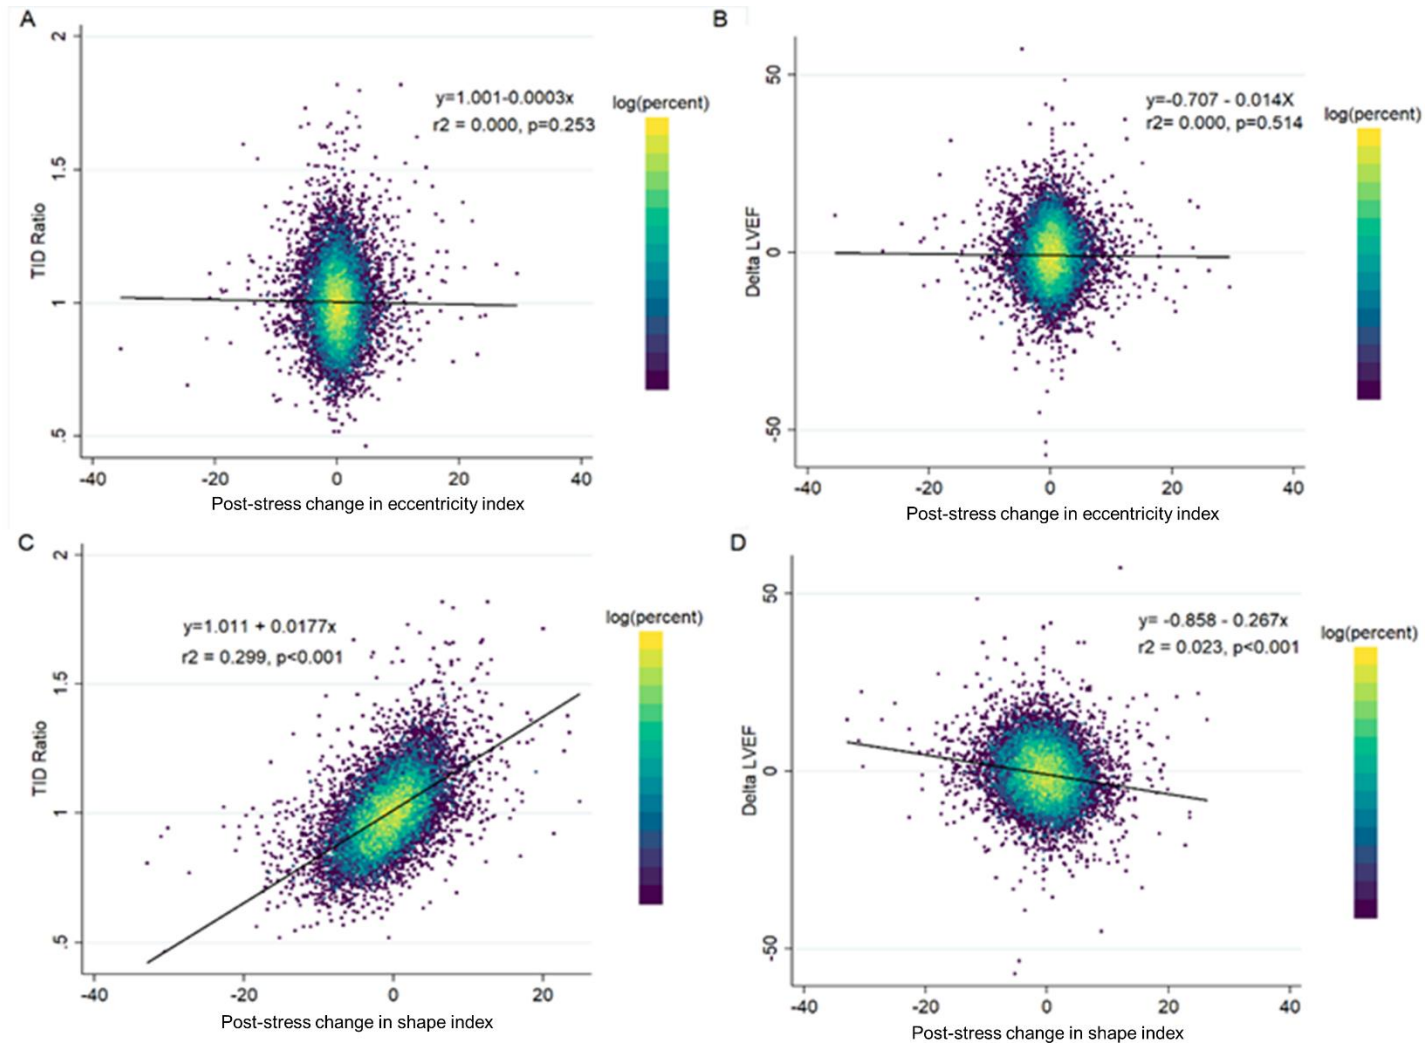

Correlation gradient plots between post-stress change in shape index and eccentricity index with transient ischemic dilation (TID) ratio and post-stress change in left ventricular ejection fraction (LVEF). There was no correlation between post-stress change in eccentricity index and TID (A) or change in LVEF (B). There was poor correlation between post-stress change in shape index and TID (C) and post-stress change in LVEF (D).

Supplemental Figure 3: Correlation between Shape Index and Eccentricity Index with Left Ventricular Ejection Fraction.

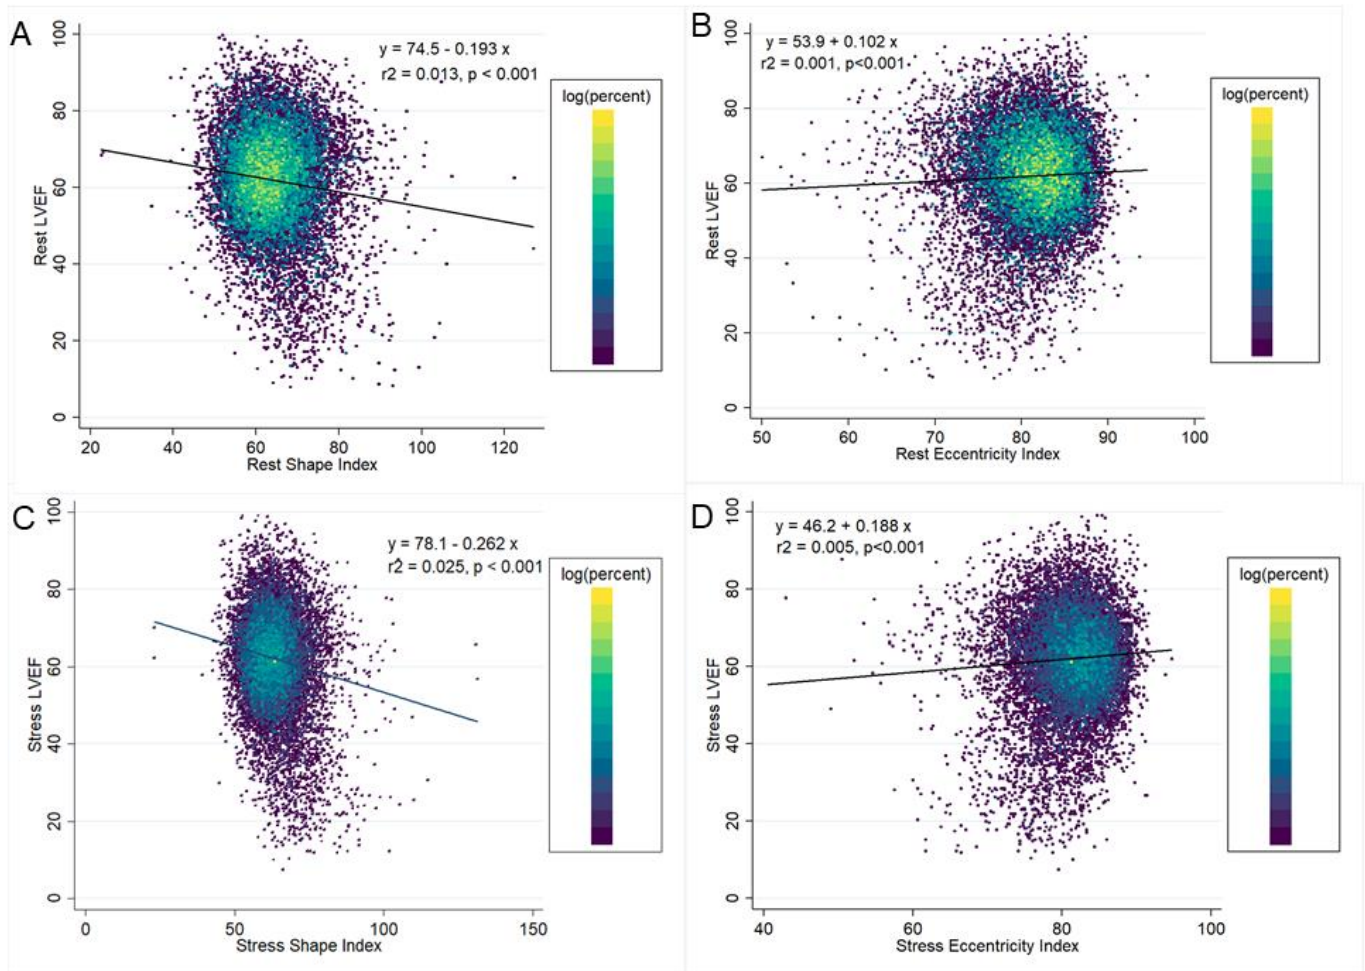

Correlation between shape index and eccentricity index with left ventricular ejection fraction (LVEF). Correlation shown for rest LVEF and rest shape index (panel A), rest LVEF and rest eccentricity index (panel B), stress LVEF and stress shape index (panel C), and stress LVEF and stress eccentricity index (panel D).

Supplemental Figure 4:

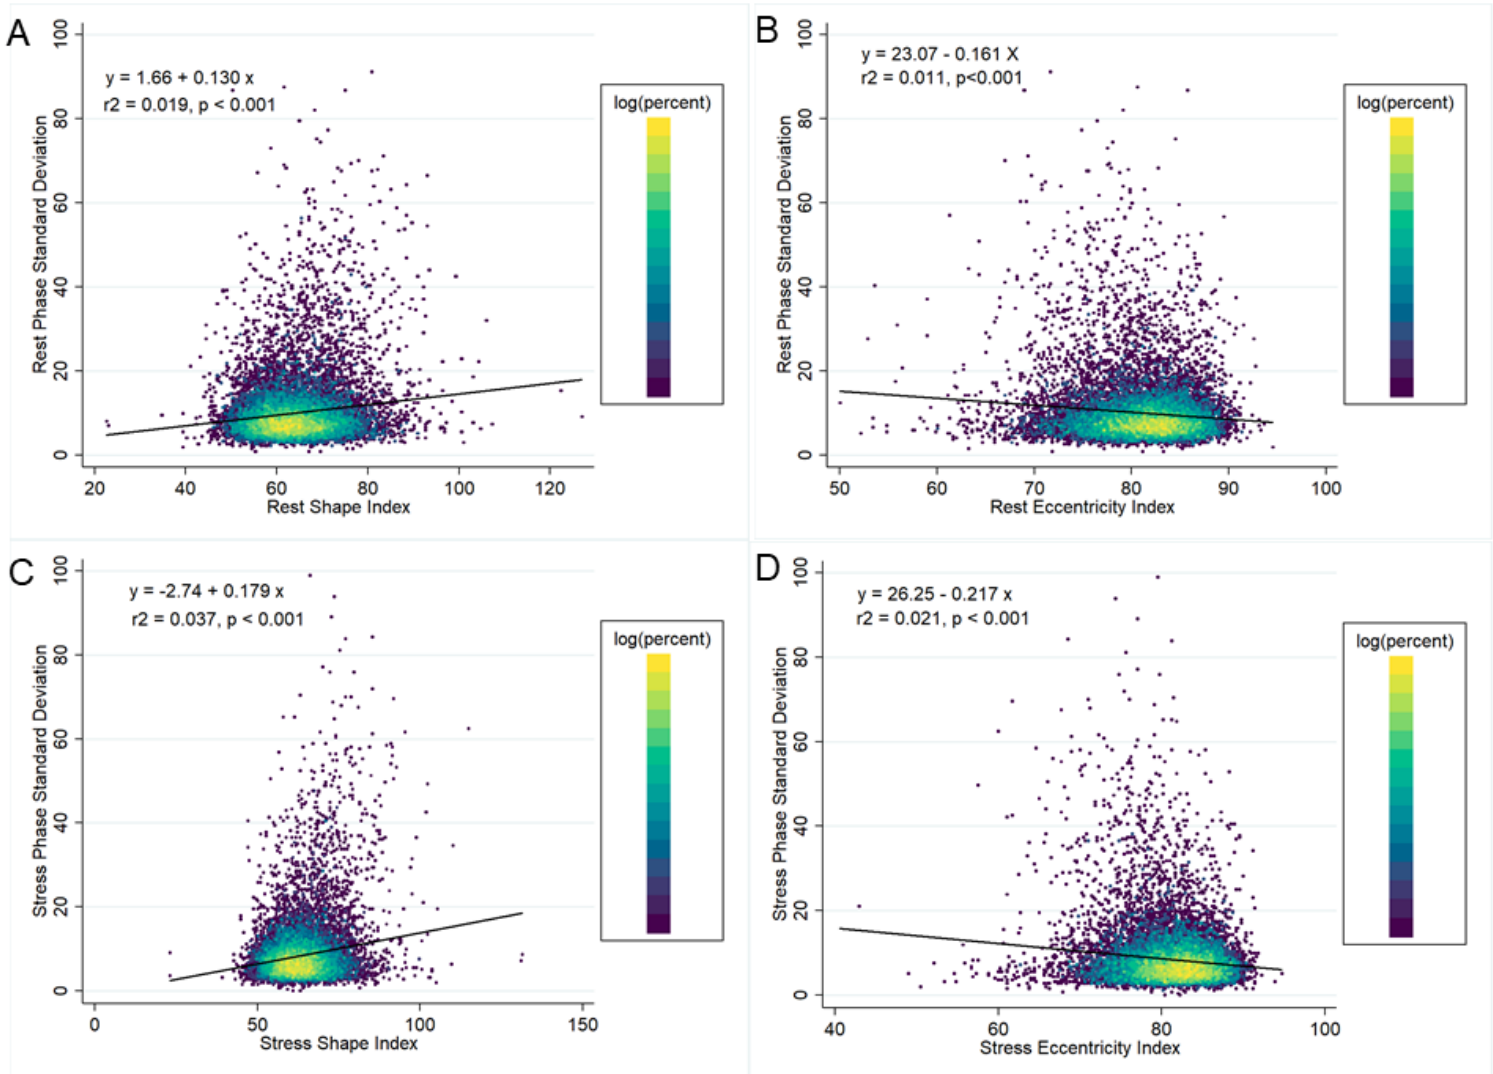

Correlation between Shape Index and Eccentricity Index with phase standard deviation (SD).

Correlation shown for rest phase SD and rest shape index (panel A), rest phase SD and rest eccentricity index (panel B), stress phase SD and stress shape index (panel C), and stress phase SD and stress eccentricity index (panel D).

Supplemental Figure 5: Comparison of area under the curve for eccentricity index and shape index variables

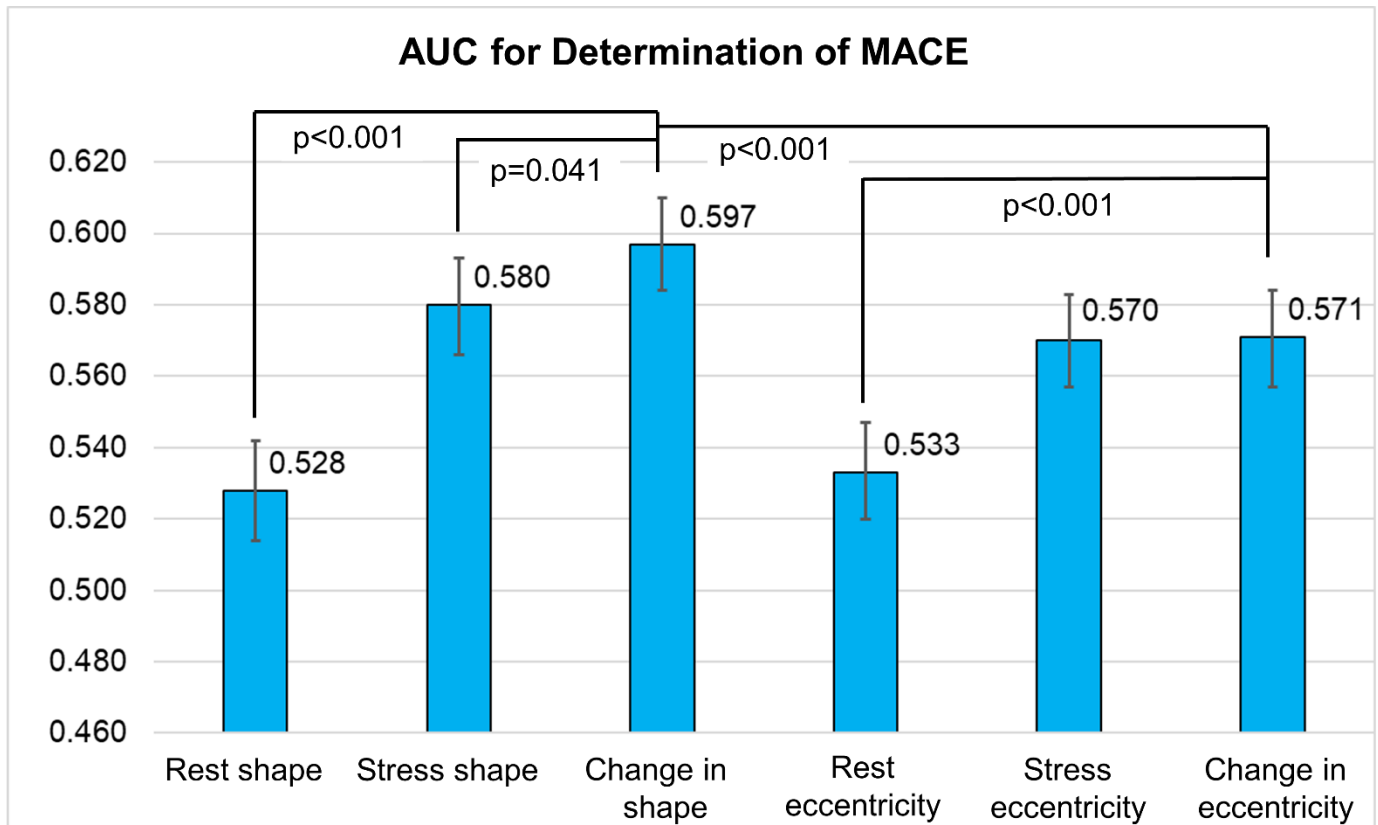

Comparison of receiver operating characteristic (ROC) area under the curve (AUC) of eccentricity index and shape index variables for MACE. Post-stress change in shape index had significantly higher AUC compared to all other measures. There was no significant difference in discrimination between stress eccentricity index and post-stress change in eccentricity index.

MACE – major adverse cardiovascular event.
